# Supplementary material for: Matrix-bound nanovesicles within ECM bioscaffolds
Source: PubMed Central journal article supplement — Sci Adv. 2016 Jun 10;2(6):e1600502. doi: 10.1126/sciadv.1600502 (PMC4928894; doi:10.1126/sciadv.1600502), 2016-06-10
Supplement: 1600502_SM.pdf [file 1600502_SM.pdf]

## Supplementary Materials for

### **Matrix-bound nanovesicles within ECM bioscaffolds**

Luai Huleihel, George S. Hussey, Juan Diego Naranjo, Li Zhang, Jenna L. Dziki, Neill J. Turner, Donna B. Stolz, Stephen F. Badylak

Published 10 June 2016, *Sci. Adv.* **2**, e1600502 (2016)

DOI: 10.1126/sciadv.1600502

#### **The PDF file includes:**

- table S1. Comparison of nucleic acid concentration from UBM, SIS, or dermis and their commercially available equivalents.
- fig. S1. Nuclease protection assay.

## Supplementary Materials

### Table S1

|               | Untreated (control)           |                                            | Proteinase K                  |                                            | Collagenase                   |                                            |
|---------------|-------------------------------|--------------------------------------------|-------------------------------|--------------------------------------------|-------------------------------|--------------------------------------------|
|               | dsDNA $\mu\text{g}/\text{mg}$ | Total nucleic acid $\mu\text{g}/\text{mg}$ | dsDNA $\mu\text{g}/\text{mg}$ | Total nucleic acid $\mu\text{g}/\text{mg}$ | dsDNA $\mu\text{g}/\text{mg}$ | Total nucleic acid $\mu\text{g}/\text{mg}$ |
| UBM           | 1.99 $\pm$ 0.15               | 4.94 $\pm$ 0.31                            | 2.58 $\pm$ 0.03               | 10.54 $\pm$ 0.24                           | 2.38 $\pm$ 0.1                | 9.80 $\pm$ 0.37                            |
| MatriStem™    | 1.56 $\pm$ 0.03               | 5.21 $\pm$ 0.26                            | 2.27 $\pm$ 0.07               | 11.93 $\pm$ 0.62                           | 2.14 $\pm$ 0.12               | 9.99 $\pm$ 0.59                            |
| SIS           | 1.57 $\pm$ 0.13               | 6.97 $\pm$ 0.27                            | 2.24 $\pm$ 0.03               | 12.79 $\pm$ 0.52                           | 2.02 $\pm$ 0.1                | 10.62 $\pm$ 0.82                           |
| Cook® Biotech | 1.46 $\pm$ 0.20               | 6.77 $\pm$ 0.99                            | 2.16 $\pm$ 0.09               | 12.37 $\pm$ 1.21                           | 1.80 $\pm$ 0.13               | 12.15 $\pm$ 0.37                           |
| Dermis        | 0.07 $\pm$ 0.01               | 0.30 $\pm$ 0.07                            | 0.10 $\pm$ 0.01               | 0.56 $\pm$ 0.04                            | 0.11 $\pm$ 0.01               | 0.65 $\pm$ 0.14                            |
| XenMatrix™    | 0.06 $\pm$ 0.00               | 0.29 $\pm$ 0.06                            | 0.08 $\pm$ 0.01               | 0.45 $\pm$ 0.10                            | 0.09 $\pm$ 0.01               | 0.64 $\pm$ 0.11                            |

**table S1. Comparison of nucleic acid concentration from UBM, SIS, or dermis and their commercially available equivalents.** Concentration of dsDNA and total nucleic acid isolated from undigested, Proteinase K or Collagenase digested ECM scaffolds ( $\mu\text{g}$  nucleic acid/mg dry weight ECM). Data are presented as means  $\pm$  s.d., n=3 isolations per sample.

Figure S1

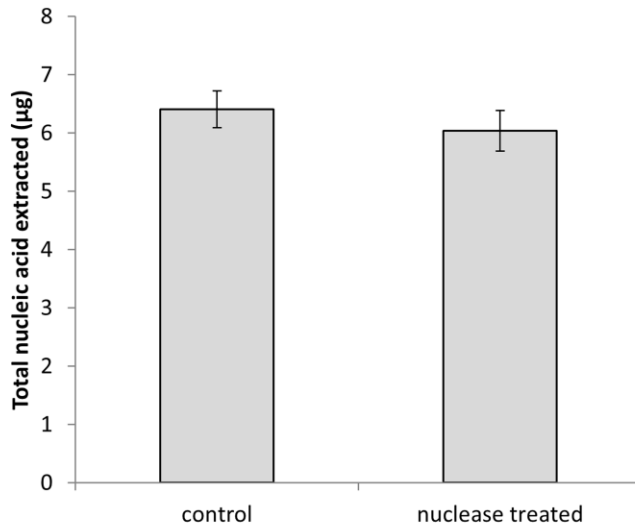

**fig. S1. Nuclease protection assay.** MBVs were extracted from 20mg collagenase-treated UBM, and resuspended in 100µl PBS. MBVs were treated RNase A and DNase I at room temperature for 30 minutes. Nucleic acid was extracted and the concentration measured by UV absorbance @ 260nm. The average amount of nucleic acid extracted from control (untreated) and nuclease treated samples do not differ significantly. Data are presented as means  $\pm$  s.d., n=5 isolations per sample.
